# Supplementary material for: Bivalent booster effectiveness against severe COVID-19 outcomes in Finland, September 2022 – March 2023
Source: bioRxiv or medRxiv preprint supplement (doi:10.1101/2023.03.02.23286561), 2023-05-08
Supplement: Supplementary file [file media-2.pdf]

Chief Doctor Otto Helve,  
Director of the Department for Health Security  
Finnish Institute for Health and Welfare / Terveyden ja Hyvinvoinnin Laitos  
otto.helve@thl.fi

To whom it may concern:

Subject: Bivalent booster effectiveness against severe COVID-19 outcomes in Finland, September 2022 – March 2023

As director of the department for Health security of the Finnish Institute for Health and Welfare, I certify that:

- I am the competent authority for assessing whether research requires institutional ethical review or if the Finnish communicable diseases law (Tartuntatautilaki 1227/2016) and the law on the duties of the Finnish institute for Health (Laki Terveyden ja hyvinvoinnin laitoksesta 668/2008) and Welfare allows the implementation of the research without seeking further ethical review.
- The research presented by Poukka et al in “Bivalent booster effectiveness against severe COVID-19 outcomes in Finland, September 2022 – March 2023” did not require further ethical review before implementation as its aim was to monitor vaccine effectiveness of infectious disease (Tartuntatautilaki 1227/2016).



Helsinki, May 5th 2023  
Chief Doctor Otto Helve
